# Supplementary material
Source: publisher figshare collection journal article supplement (https://acs.figshare.com/ndownloader/files/4372078)
Supplement: Supplementary file 1 [file 4372078]

 
data_a 
 
_audit_creation_method            SHELXL-97 
_chemical_name_systematic 
; 
 ? 
; 
_chemical_name_common             ? 
_chemical_melting_point           ? 
_chemical_formula_moiety          'C12 H13 N3 O5, 2(H2 O)'
_chemical_formula_sum 
 'C12 H17 N3 O7' 
_chemical_formula_weight          315.29 
 
loop_ 
 _atom_type_symbol 
 _atom_type_description 
 _atom_type_scat_dispersion_real 
 _atom_type_scat_dispersion_imag 
 _atom_type_scat_source 
 'C'  'C'   0.0033   0.0016 
 'International Tables Vol C Tables 4.2.6.8 and 6.1.1.4' 
 'H'  'H'   0.0000   0.0000 
 'International Tables Vol C Tables 4.2.6.8 and 6.1.1.4' 
 'N'  'N'   0.0061   0.0033 
 'International Tables Vol C Tables 4.2.6.8 and 6.1.1.4' 
 'O'  'O'   0.0106   0.0060 
 'International Tables Vol C Tables 4.2.6.8 and 6.1.1.4' 
 
_symmetry_cell_setting            triclinic
_symmetry_space_group_name_H-M    P-1
 
loop_ 
 _symmetry_equiv_pos_as_xyz 
 'x, y, z' 
 '-x, -y, -z' 
 
_cell_length_a                    8.933(2) 
_cell_length_b                    9.339(2) 
_cell_length_c                    9.9444(18) 
_cell_angle_alpha                 116.449(7) 
_cell_angle_beta                  100.762(11) 
_cell_angle_gamma                 92.763(12) 
_cell_volume                      721.5(3) 
_cell_formula_units_Z             2 
_cell_measurement_temperature     173(2) 
_cell_measurement_reflns_used     324
_cell_measurement_theta_min       2.17
_cell_measurement_theta_max       27.48 
 
_exptl_crystal_description        block
_exptl_crystal_colour             colorless
_exptl_crystal_size_max           0.23 
_exptl_crystal_size_mid           0.15 
_exptl_crystal_size_min           0.15 
_exptl_crystal_density_meas       ? 
_exptl_crystal_density_diffrn     1.451 
_exptl_crystal_density_method     'not measured' 
_exptl_crystal_F_000              332 
_exptl_absorpt_coefficient_mu     0.121 
_exptl_absorpt_correction_type    numerical
_exptl_absorpt_correction_T_min   0.9728 
_exptl_absorpt_correction_T_max   0.9821 
_exptl_absorpt_process_details    'CrystalClear (Rigaku Inc., 2007)'

 
_exptl_special_details 
; 
 ? 
; 
 
_diffrn_ambient_temperature       173(2) 
_diffrn_radiation_wavelength      0.71073 
_diffrn_radiation_type            MoK\a 
_diffrn_radiation_source          'sealed tube' 
_diffrn_radiation_monochromator   graphite 
_diffrn_measurement_device_type   'Saturn724+ CCD' 
_diffrn_measurement_method        '\w scans at fixed \c = 45\%'    
_diffrn_detector_area_resol_mean  ? 
_diffrn_standards_number          ? 
_diffrn_standards_interval_count  ? 
_diffrn_standards_interval_time   ? 
_diffrn_standards_decay_%         ? 
_diffrn_reflns_number             11847 
_diffrn_reflns_av_R_equivalents   0.0371 
_diffrn_reflns_av_sigmaI/netI     0.0275 
_diffrn_reflns_limit_h_min        -11 
_diffrn_reflns_limit_h_max        11 
_diffrn_reflns_limit_k_min        -12 
_diffrn_reflns_limit_k_max        12 
_diffrn_reflns_limit_l_min        -12 
_diffrn_reflns_limit_l_max        12 
_diffrn_reflns_theta_min          2.35 
_diffrn_reflns_theta_max          27.49 
_reflns_number_total              3304 
_reflns_number_gt                 3115 
_reflns_threshold_expression      >2sigma(I) 
 
_computing_data_collection        'CrystalClear (Rigaku Inc., 2007)' 
_computing_cell_refinement        'CrystalClear (Rigaku Inc., 2007)' 
_computing_data_reduction         'CrystalClear (Rigaku Inc., 2007)' 
_computing_structure_solution     'SHELXS-97 (Sheldrick, 1990)' 
_computing_structure_refinement   'SHELXL-97 (Sheldrick, 1997)' 
_computing_molecular_graphics     'XP in Siemens SHELXTL (Sheldrick, 1994)' 
_computing_publication_material   'SHELX97 (Sheldrick, 1997)' 
 
_refine_special_details 
; 
 Refinement of F^2^ against ALL reflections.  The weighted R-factor wR and 
 goodness of fit S are based on F^2^, conventional R-factors R are based 
 on F, with F set to zero for negative F^2^. The threshold expression of 
 F^2^ > 2sigma(F^2^) is used only for calculating R-factors(gt) etc. and is 
 not relevant to the choice of reflections for refinement.  R-factors based 
 on F^2^ are statistically about twice as large as those based on F, and R- 
 factors based on ALL data will be even larger. 
; 
 
_refine_ls_structure_factor_coef  Fsqd  
_refine_ls_matrix_type            full 
_refine_ls_weighting_scheme       calc  
_refine_ls_weighting_details 
 'calc w=1/[\s^2^(Fo^2^)+(0.0672P)^2^+0.1884P] where P=(Fo^2^+2Fc^2^)/3' 
_atom_sites_solution_primary      direct 
_atom_sites_solution_secondary    difmap 
_atom_sites_solution_hydrogens    geom 
_refine_ls_hydrogen_treatment     constr
_refine_ls_extinction_method      none 
_refine_ls_extinction_coef        ? 
_refine_ls_number_reflns          3304 
_refine_ls_number_parameters      202 
_refine_ls_number_restraints      0 
_refine_ls_R_factor_all           0.0564 
_refine_ls_R_factor_gt            0.0531 
_refine_ls_wR_factor_ref          0.1472 
_refine_ls_wR_factor_gt           0.1448 
_refine_ls_goodness_of_fit_ref    1.222 
_refine_ls_restrained_S_all       1.222 
_refine_ls_shift/su_max           0.000 
_refine_ls_shift/su_mean          0.000 
 
loop_ 
 _atom_site_label 
 _atom_site_type_symbol 
 _atom_site_fract_x 
 _atom_site_fract_y 
 _atom_site_fract_z 
 _atom_site_U_iso_or_equiv 
 _atom_site_adp_type 
 _atom_site_occupancy 
 _atom_site_symmetry_multiplicity 
 _atom_site_calc_flag 
 _atom_site_refinement_flags 
 _atom_site_disorder_assembly 
 _atom_site_disorder_group 
O1 O 0.35378(14) 0.54373(14) 0.72075(13) 0.0317(3) Uani 1 1 d . . . 
O1W O 0.05580(14) 0.21857(15) 0.59464(15) 0.0362(3) Uani 1 1 d . . . 
H1WA H 0.0893 0.1540 0.5200 0.062(8) Uiso 1 1 d R . . 
H1WB H 0.0031 0.1625 0.6207 0.070(8) Uiso 1 1 d R . . 
O2 O 0.23271(14) 0.45549(14) 0.85250(14) 0.0334(3) Uani 1 1 d . . . 
H2 H 0.1922 0.3804 0.7638 0.040 Uiso 1 1 d R . . 
O2W O 0.20358(16) 0.66237(17) 0.51625(15) 0.0434(3) Uani 1 1 d . . . 
H2WA H 0.2224 0.6220 0.5770 0.052 Uiso 1 1 d R . . 
H2WB H 0.1243 0.7070 0.5283 0.052 Uiso 1 1 d R . . 
O3 O 0.88674(14) 1.02172(15) 0.67637(14) 0.0344(3) Uani 1 1 d . . . 
O4 O 0.98270(15) 1.30916(15) 1.23510(14) 0.0355(3) Uani 1 1 d . . . 
O5 O 1.15080(15) 1.48459(16) 1.22002(14) 0.0385(3) Uani 1 1 d . . . 
H5 H 1.1696 1.5322 1.3170 0.046 Uiso 1 1 d R . . 
N8 N 0.58300(16) 0.78835(16) 0.87892(15) 0.0270(3) Uani 1 1 d . . . 
H8A H 0.5344 0.7112 0.7874 0.032 Uiso 1 1 calc R . . 
N9 N 0.69357(15) 0.89913(16) 0.89094(15) 0.0250(3) Uani 1 1 d . . . 
N12 N 0.90626(16) 1.12334(17) 0.93348(16) 0.0289(3) Uani 1 1 d . . . 
H12A H 0.8758 1.1054 1.0045 0.035 Uiso 1 1 calc R . . 
C1 C 0.54554(18) 0.79563(19) 1.01068(18) 0.0240(3) Uani 1 1 d . . . 
C2 C 0.62527(19) 0.9142(2) 1.15794(18) 0.0286(4) Uani 1 1 d . . . 
H2A H 0.7053 0.9917 1.1681 0.034 Uiso 1 1 calc R . . 
C3 C 0.5877(2) 0.9187(2) 1.28830(19) 0.0330(4) Uani 1 1 d . . . 
H3A H 0.6428 0.9989 1.3876 0.040 Uiso 1 1 calc R . . 
C4 C 0.4702(2) 0.8071(2) 1.2759(2) 0.0334(4) Uani 1 1 d . . . 
H4A H 0.4439 0.8120 1.3660 0.040 Uiso 1 1 calc R . . 
C5 C 0.39206(19) 0.6891(2) 1.13145(19) 0.0292(4) Uani 1 1 d . . . 
H5A H 0.3131 0.6117 1.1232 0.035 Uiso 1 1 calc R . . 
C6 C 0.42671(17) 0.68116(18) 0.99725(18) 0.0241(3) Uani 1 1 d . . . 
C7 C 0.33677(18) 0.55559(19) 0.84442(19) 0.0260(3) Uani 1 1 d . . . 
C10 C 0.72400(18) 0.88690(19) 0.76474(18) 0.0258(3) Uani 1 1 d . . . 
C11 C 0.84657(18) 1.01622(19) 0.78742(18) 0.0255(3) Uani 1 1 d . . . 
C13 C 1.01621(18) 1.26617(19) 0.98679(19) 0.0279(3) Uani 1 1 d . . . 
H13A H 0.9744 1.3364 0.9428 0.033 Uiso 1 1 calc R . . 
H13B H 1.1130 1.2359 0.9540 0.033 Uiso 1 1 calc R . . 
C14 C 1.04705(18) 1.3546(2) 1.16120(19) 0.0282(3) Uani 1 1 d . . . 
C15 C 0.6481(2) 0.7580(2) 0.60636(19) 0.0338(4) Uani 1 1 d . . . 
H15A H 0.5361 0.7546 0.5903 0.051 Uiso 1 1 calc R . . 
H15B H 0.6746 0.6531 0.5949 0.051 Uiso 1 1 calc R . . 
H15C H 0.6837 0.7814 0.5299 0.051 Uiso 1 1 calc R . . 
 
loop_ 
 _atom_site_aniso_label 
 _atom_site_aniso_U_11 
 _atom_site_aniso_U_22 
 _atom_site_aniso_U_33 
 _atom_site_aniso_U_23 
 _atom_site_aniso_U_13 
 _atom_site_aniso_U_12 
O1 0.0355(6) 0.0323(6) 0.0248(6) 0.0117(5) 0.0070(5) -0.0029(5) 
O1W 0.0387(7) 0.0318(6) 0.0376(7) 0.0135(6) 0.0159(6) -0.0015(5) 
O2 0.0348(6) 0.0315(6) 0.0320(6) 0.0142(5) 0.0075(5) -0.0057(5) 
O2W 0.0457(8) 0.0451(8) 0.0346(7) 0.0161(6) 0.0052(6) 0.0040(6) 
O3 0.0405(7) 0.0352(6) 0.0299(6) 0.0153(5) 0.0149(5) -0.0018(5) 
O4 0.0408(7) 0.0371(7) 0.0315(6) 0.0172(5) 0.0127(5) 0.0000(5) 
O5 0.0427(7) 0.0381(7) 0.0285(6) 0.0128(5) 0.0057(5) -0.0113(6) 
N8 0.0310(7) 0.0260(7) 0.0216(6) 0.0097(5) 0.0062(5) -0.0049(5) 
N9 0.0255(6) 0.0249(6) 0.0264(7) 0.0129(5) 0.0079(5) 0.0012(5) 
N12 0.0315(7) 0.0305(7) 0.0263(7) 0.0149(6) 0.0080(6) -0.0028(6) 
C1 0.0260(7) 0.0248(7) 0.0241(7) 0.0128(6) 0.0080(6) 0.0055(6) 
C2 0.0307(8) 0.0269(8) 0.0255(8) 0.0101(7) 0.0066(6) 0.0013(6) 
C3 0.0356(9) 0.0349(9) 0.0249(8) 0.0110(7) 0.0063(7) 0.0067(7) 
C4 0.0366(9) 0.0442(10) 0.0263(8) 0.0198(8) 0.0125(7) 0.0115(8) 
C5 0.0290(8) 0.0350(9) 0.0315(8) 0.0207(7) 0.0110(7) 0.0059(6) 
C6 0.0245(7) 0.0256(8) 0.0249(8) 0.0132(6) 0.0078(6) 0.0056(6) 
C7 0.0264(7) 0.0247(7) 0.0294(8) 0.0141(7) 0.0083(6) 0.0029(6) 
C10 0.0264(8) 0.0266(8) 0.0259(8) 0.0127(6) 0.0080(6) 0.0039(6) 
C11 0.0260(7) 0.0268(8) 0.0271(8) 0.0140(6) 0.0097(6) 0.0045(6) 
C13 0.0277(8) 0.0278(8) 0.0293(8) 0.0144(7) 0.0076(6) -0.0010(6) 
C14 0.0270(8) 0.0292(8) 0.0322(8) 0.0166(7) 0.0097(6) 0.0038(6) 
C15 0.0382(9) 0.0356(9) 0.0244(8) 0.0120(7) 0.0068(7) -0.0031(7) 
 
_geom_special_details 
; 
 All esds (except the esd in the dihedral angle between two l.s. planes) 
 are estimated using the full covariance matrix.  The cell esds are taken 
 into account individually in the estimation of esds in distances, angles 
 and torsion angles; correlations between esds in cell parameters are only 
 used when they are defined by crystal symmetry.  An approximate (isotropic) 
 treatment of cell esds is used for estimating esds involving l.s. planes. 
; 
 
loop_ 
 _geom_bond_atom_site_label_1 
 _geom_bond_atom_site_label_2 
 _geom_bond_distance 
 _geom_bond_site_symmetry_2 
 _geom_bond_publ_flag 
O1 C7 1.2239(19) . ? 
O1W H1WA 0.8399 . ? 
O1W H1WB 0.8400 . ? 
O2 C7 1.3249(19) . ? 
O2 H2 0.8400 . ? 
O2W H2WA 0.8400 . ? 
O2W H2WB 0.8400 . ? 
O3 C11 1.2440(19) . ? 
O4 C14 1.209(2) . ? 
O5 C14 1.316(2) . ? 
O5 H5 0.8400 . ? 
N8 N9 1.3444(18) . ? 
N8 C1 1.386(2) . ? 
N8 H8A 0.8800 . ? 
N9 C10 1.290(2) . ? 
N12 C11 1.327(2) . ? 
N12 C13 1.440(2) . ? 
N12 H12A 0.8800 . ? 
C1 C2 1.403(2) . ? 
C1 C6 1.413(2) . ? 
C2 C3 1.383(2) . ? 
C2 H2A 0.9500 . ? 
C3 C4 1.391(3) . ? 
C3 H3A 0.9500 . ? 
C4 C5 1.381(3) . ? 
C4 H4A 0.9500 . ? 
C5 C6 1.397(2) . ? 
C5 H5A 0.9500 . ? 
C6 C7 1.482(2) . ? 
C10 C15 1.491(2) . ? 
C10 C11 1.499(2) . ? 
C13 C14 1.513(2) . ? 
C13 H13A 0.9900 . ? 
C13 H13B 0.9900 . ? 
C15 H15A 0.9800 . ? 
C15 H15B 0.9800 . ? 
C15 H15C 0.9800 . ? 
 
loop_ 
 _geom_angle_atom_site_label_1 
 _geom_angle_atom_site_label_2 
 _geom_angle_atom_site_label_3 
 _geom_angle 
 _geom_angle_site_symmetry_1 
 _geom_angle_site_symmetry_3 
 _geom_angle_publ_flag 
H1WA O1W H1WB 107.0 . . ? 
C7 O2 H2 110.2 . . ? 
H2WA O2W H2WB 109.6 . . ? 
C14 O5 H5 111.6 . . ? 
N9 N8 C1 120.01(13) . . ? 
N9 N8 H8A 120.0 . . ? 
C1 N8 H8A 120.0 . . ? 
C10 N9 N8 117.54(13) . . ? 
C11 N12 C13 126.19(13) . . ? 
C11 N12 H12A 116.9 . . ? 
C13 N12 H12A 116.9 . . ? 
N8 C1 C2 120.88(14) . . ? 
N8 C1 C6 119.79(14) . . ? 
C2 C1 C6 119.32(14) . . ? 
C3 C2 C1 120.16(16) . . ? 
C3 C2 H2A 119.9 . . ? 
C1 C2 H2A 119.9 . . ? 
C2 C3 C4 120.84(16) . . ? 
C2 C3 H3A 119.6 . . ? 
C4 C3 H3A 119.6 . . ? 
C5 C4 C3 119.36(15) . . ? 
C5 C4 H4A 120.3 . . ? 
C3 C4 H4A 120.3 . . ? 
C4 C5 C6 121.37(15) . . ? 
C4 C5 H5A 119.3 . . ? 
C6 C5 H5A 119.3 . . ? 
C5 C6 C1 118.95(15) . . ? 
C5 C6 C7 119.57(14) . . ? 
C1 C6 C7 121.47(14) . . ? 
O1 C7 O2 121.97(15) . . ? 
O1 C7 C6 124.31(14) . . ? 
O2 C7 C6 113.71(14) . . ? 
N9 C10 C15 125.22(15) . . ? 
N9 C10 C11 114.40(14) . . ? 
C15 C10 C11 120.38(14) . . ? 
O3 C11 N12 123.40(15) . . ? 
O3 C11 C10 121.78(14) . . ? 
N12 C11 C10 114.82(13) . . ? 
N12 C13 C14 107.74(13) . . ? 
N12 C13 H13A 110.2 . . ? 
C14 C13 H13A 110.2 . . ? 
N12 C13 H13B 110.2 . . ? 
C14 C13 H13B 110.2 . . ? 
H13A C13 H13B 108.5 . . ? 
O4 C14 O5 125.17(16) . . ? 
O4 C14 C13 123.14(15) . . ? 
O5 C14 C13 111.70(14) . . ? 
C10 C15 H15A 109.5 . . ? 
C10 C15 H15B 109.5 . . ? 
H15A C15 H15B 109.5 . . ? 
C10 C15 H15C 109.5 . . ? 
H15A C15 H15C 109.5 . . ? 
H15B C15 H15C 109.5 . . ? 
 
loop_ 
 _geom_torsion_atom_site_label_1 
 _geom_torsion_atom_site_label_2 
 _geom_torsion_atom_site_label_3 
 _geom_torsion_atom_site_label_4 
 _geom_torsion 
 _geom_torsion_site_symmetry_1 
 _geom_torsion_site_symmetry_2 
 _geom_torsion_site_symmetry_3 
 _geom_torsion_site_symmetry_4 
 _geom_torsion_publ_flag 
C1 N8 N9 C10 180.00(14) . . . . ? 
N9 N8 C1 C2 -2.2(2) . . . . ? 
N9 N8 C1 C6 178.51(13) . . . . ? 
N8 C1 C2 C3 -179.24(15) . . . . ? 
C6 C1 C2 C3 0.0(2) . . . . ? 
C1 C2 C3 C4 -0.4(3) . . . . ? 
C2 C3 C4 C5 1.0(3) . . . . ? 
C3 C4 C5 C6 -1.2(3) . . . . ? 
C4 C5 C6 C1 0.7(2) . . . . ? 
C4 C5 C6 C7 -178.14(14) . . . . ? 
N8 C1 C6 C5 179.12(14) . . . . ? 
C2 C1 C6 C5 -0.1(2) . . . . ? 
N8 C1 C6 C7 -2.0(2) . . . . ? 
C2 C1 C6 C7 178.70(14) . . . . ? 
C5 C6 C7 O1 176.49(15) . . . . ? 
C1 C6 C7 O1 -2.3(2) . . . . ? 
C5 C6 C7 O2 -2.9(2) . . . . ? 
C1 C6 C7 O2 178.30(13) . . . . ? 
N8 N9 C10 C15 -1.1(2) . . . . ? 
N8 N9 C10 C11 179.03(13) . . . . ? 
C13 N12 C11 O3 4.6(3) . . . . ? 
C13 N12 C11 C10 -174.76(15) . . . . ? 
N9 C10 C11 O3 -178.94(14) . . . . ? 
C15 C10 C11 O3 1.2(2) . . . . ? 
N9 C10 C11 N12 0.4(2) . . . . ? 
C15 C10 C11 N12 -179.51(14) . . . . ? 
C11 N12 C13 C14 178.06(15) . . . . ? 
N12 C13 C14 O4 -2.2(2) . . . . ? 
N12 C13 C14 O5 177.90(14) . . . . ? 
 
_diffrn_measured_fraction_theta_max    0.995 
_diffrn_reflns_theta_full              27.49 
_diffrn_measured_fraction_theta_full   0.995 
_refine_diff_density_max    0.282 
_refine_diff_density_min   -0.284 
_refine_diff_density_rms    0.098 
